# Supplementary material for: A correlation study between hydrogen-bonded network and gelation ability of three galactose derivatives
Source: Royal Society of Chemistry journal article supplement (doi:10.1039/c5ce00229j), 2015-01-01
Supplement: c5ce00229j1.pdf [file c5ce00229j1.pdf]

## **Electronic Supplementary Information**

*for*

### **A correlation study between hydrogen bonded network and gelation ability of three galactose derivatives**

Somnath Mukherjee\*, G. Rama Krishna, Balaram Mukhopadhyay and C. Malla  
Reddy\*

Indian Institute of Science Education and Research (IISER) Kolkata, Mohanpur Campus,  
Mohanpur 741246, India. E-mail: [cmallareddy@gmail.com](mailto:cmallareddy@gmail.com), E-mail: [carbo.som@gmail.com](mailto:carbo.som@gmail.com);

Fax: +91 33 25873020

## 1. Synthetic scheme:

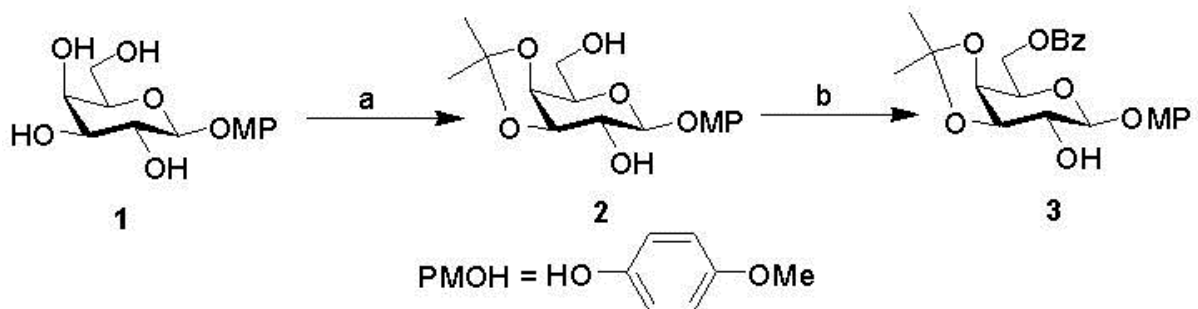

**Scheme S1:** Synthesis of the compounds **2** and **3**. **Reagents and condition:** a) acetone, H<sub>2</sub>SO<sub>4</sub>-silica, rt b) Et<sub>3</sub>N, BzCN, rt

## 2. NMR Characterization:

### Compound 1:

<sup>1</sup>H NMR (500 MHz, CD<sub>3</sub>OD)  $\delta$ : 7.07-6.8 (m, 4H, ArH), 4.86 (CD<sub>3</sub>OD-H<sub>2</sub>O peak), 4.73 (d, 1H,  $J_{1,2}$  7.5 Hz, H-1), 3.89 (dd, 1H,  $J_{1,2}$  = 0.5 Hz,  $J_{3,4}$  = 1Hz, H-4), 3.79-3.75 (m, 3H, H-2, H-6a, H-6b), 3.74 (s, 3H, C<sub>6</sub>H<sub>4</sub>-OCH<sub>3</sub>), 3.63 (m, 1H, H-5), 3.56 (dd, 1H,  $J_{1,2}$  3.5,  $J_{3,4}$  3.0 Hz, H-3), 3.31 (solvent residual peak).

<sup>13</sup>C NMR (125 MHz, CD<sub>3</sub>OD)  $\delta$ : 156.59, 153.31(ArC-O), 119.26(2), 115.42(2) (ArC), 104.08 (C-1), 76.86, 74.87, 72.36, 70.21, 62.40 (CH<sub>2</sub>), 56.05 (C<sub>6</sub>H<sub>4</sub>-OCH<sub>3</sub>). [49.513-48.492 = NMR solvent signal]

### Compound 2:

<sup>1</sup>H NMR (500 MHz, CDCl<sub>3</sub>)  $\delta$ : 7.26 (solvent residual peak), 6.99-6.80 (m, 4H, ArH), 4.70 (d, 1H,  $J_{1,2}$  8.0 Hz, H-1), 4.20-4.16 (m, 2H, H-3, H-4), 4.01-3.93 (m, 2H, H-5, H-6a), 3.86-3.79 (m, 2H, H-6b, H-2), 3.76 (s, 3H, C<sub>6</sub>H<sub>4</sub>-OCH<sub>3</sub>), 2.70 (s, 1H, 2-OH), 2.22 (d, 1H,  $J_{1,2}$  6.0 Hz, 6-OH), 1.69 (CDCl<sub>3</sub>- H<sub>2</sub>O peak), 1.55, 1.36 (2s, 6H, 2 x isopropylidene-CH<sub>3</sub>).

$^{13}\text{C}$  NMR (125 MHz,  $\text{CDCl}_3$ )  $\delta$ : 155.66, 151.03 (ArC-O), 118.38(2), 114.81(2) (ArC), 110.80 [ $\text{C}(\text{CH}_3)_2$ ], 101.52 (C-1), 79.01, 73.93, 73.87, 73.54, 62.46 ( $\text{CH}_2$ ), 55.78 ( $\text{C}_6\text{H}_4\text{-OCH}_3$ ), 28.24, 26.46 (2 x isopropylidene- $\text{CH}_3$ ). [77.414-76.906 = NMR solvent signal]

### Compound 3:

$^1\text{H}$  NMR (500 MHz,  $\text{CDCl}_3$ )  $\delta$ : 8.05–6.654 (m, 9H, ArH), 7.26 (solvent residual peak), 4.70 (dd, 1H,  $J_{1,2}$ ,  $J_{3,4}$  4.0 Hz, H-6a), 4.65 (d, 1H,  $J_{1,2}$  8.0 Hz, H-1), 4.60 (dd, 1H,  $J_{1,2}$ ,  $J_{3,4}$  8.5 Hz, H-6b), 4.27 (dd, 1H,  $J_{1,2}$ ,  $J_{3,4}$  2.0 Hz, H-5), 4.23-4.19 (m, 2H, H-3, H-4), 3.87-3.84 (m, 1H, H-2), 3.71 (s, 3H,  $\text{C}_6\text{H}_4\text{-OCH}_3$ ), 2.72 (d, 1H,  $J_{1,2}$  2.5 Hz, 2-OH), 1.69 (( $\text{CDCl}_3$ -  $\text{H}_2\text{O}$  peak), 1.57, 1.38 (2s, 6H, 2 x isopropylidene- $\text{CH}_3$ ).

$^{13}\text{C}$  NMR (125 MHz,  $\text{CDCl}_3$ )  $\delta$ : 166.38 (COPh), 155.64, 151.13 (ArC-O), 133.34, 130.00, 129.87(2), 128.55(2), 118.76(2), 114.56(2) (ArC), 110.98 [ $\text{C}(\text{CH}_3)_2$ ], 101.78 (C-1), 79.03, 73.53, 73.49, 71.60, 63.81 ( $\text{CH}_2$ ), 55.68 ( $\text{C}_6\text{H}_4\text{-OCH}_3$ ), 28.20, 26.46 (2 x isopropylidene- $\text{CH}_3$ ). [77.413-76.906 = NMR solvent signal]

### 3. Determination of gel-sol transition temperature ( $T_{gel}$ ):

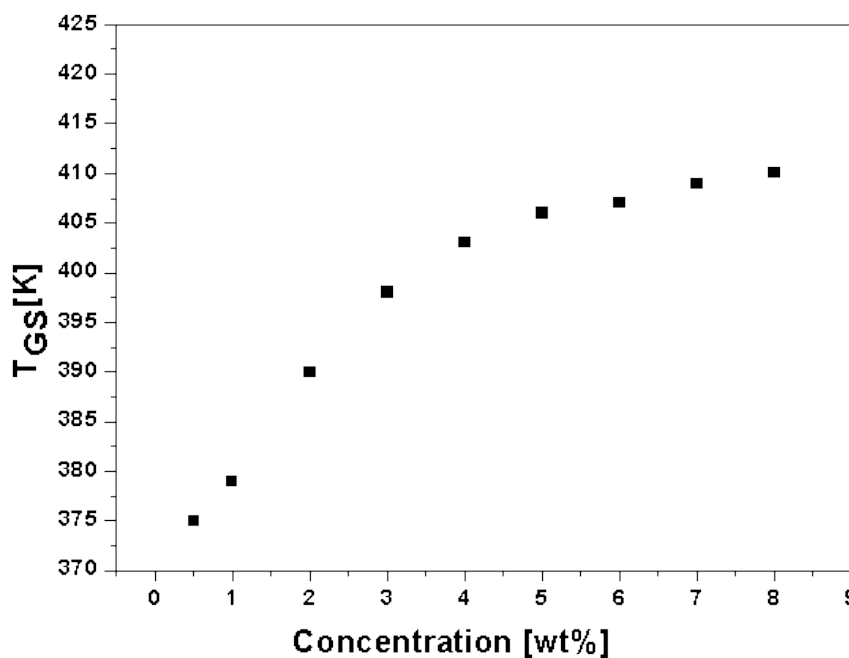

**Figure S1:** Plot of gel-sol transition temperature ( $T_{gel}$ ) against gelator concentration of 1,2-dichlorobenzene gel of compound **1**.

**4. DFT calculation:** The optimized geometry and vibrational transitions of galactoside **1** were evaluated using DFT calculations on B3LYP/6-31 G(d) level<sup>1</sup> with GAUSSIAN 03.<sup>2</sup> The starting point for the optimization process was the crystal structure of gelator molecule.

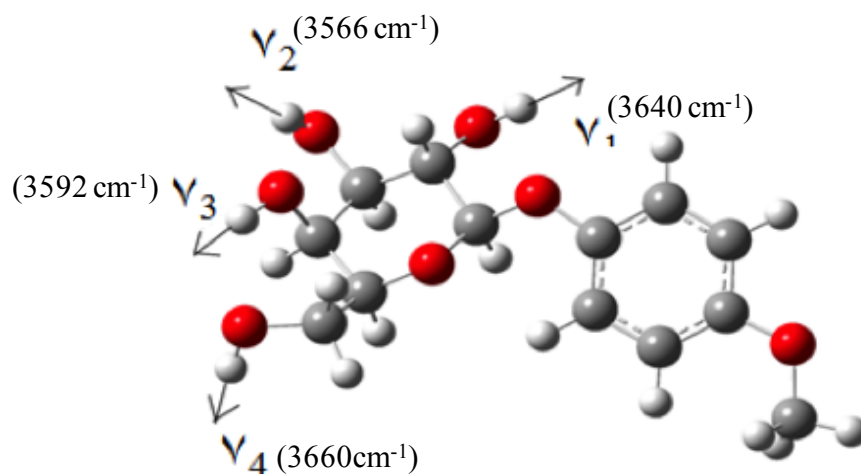

**Figure S2:** The calculated molecular conformation of compound **1** together with the assigned OH stretching modes  $\nu_1$ ,  $\nu_2$ ,  $\nu_3$ , and  $\nu_4$ .

**5. Powder X-Ray Diffraction (PXRD):** The PXRD patterns of compound **1**, **2** and **3** in different states, bulk solid, xerogel and precipitate, were collected on a Rigaku SmartLab with a Cu  $K\alpha$  radiation (1.540 Å). The tube voltage and amperage were set at 40 kV and 50 mA respectively. Each sample was scanned between 2° and 50° (2 $\theta$ ) with a step size of 0.02°. The instrument was previously calibrated using a silicon standard.

**Table S1.** Crystallographic Data and Structure Refinement Parameters of galactose derived crystals:

| <b>Formula</b>                                     | <b>C<sub>13</sub>H<sub>18</sub>O<sub>7</sub> (1)</b>            | <b>C<sub>16</sub>H<sub>22</sub>O<sub>7</sub> (2)</b>           | <b>C<sub>23</sub> H<sub>26</sub>O<sub>8</sub> (3)</b>          |
|----------------------------------------------------|-----------------------------------------------------------------|----------------------------------------------------------------|----------------------------------------------------------------|
| <b>Crystal System</b>                              | Monoclinic                                                      | Monoclinic                                                     | Monoclinic                                                     |
| <b>Space group</b>                                 | P2(1)                                                           | P2(1)                                                          | C2                                                             |
| <b><i>a</i> [Å]</b>                                | 4.8576(6)                                                       | 9.292(5)                                                       | 20.410(4)                                                      |
| <b><i>b</i> [Å]</b>                                | 9.2069(12)                                                      | 7.698(3)                                                       | 5.8212(10)                                                     |
| <b><i>c</i> [Å]</b>                                | 14.7648(19)                                                     | 12.322(5)                                                      | 18.903(4)                                                      |
| <b><i>α</i> [°]</b>                                | 90                                                              | 90                                                             | 90                                                             |
| <b><i>β</i> [°]</b>                                | 95.696(8)                                                       | 111.34(3)                                                      | 95.216(7)                                                      |
| <b><i>γ</i> [°]</b>                                | 90                                                              | 90                                                             | 90                                                             |
| <b><i>V</i> [Å<sup>3</sup>]</b>                    | 657.07(15)                                                      | 821.0(6)                                                       | 2236.6(7)                                                      |
| <b><i>Z</i></b>                                    | 2                                                               | 2                                                              | 4                                                              |
| <b><i>λ</i> [Å]</b>                                | 0.71073                                                         | 0.71073                                                        | 0.71073                                                        |
| <b><i>ρ</i><sub>calcd</sub> [gcm<sup>-3</sup>]</b> | 1.447                                                           | 1.320                                                          | 1.278                                                          |
| <b><i>F</i>[000]</b>                               | 304                                                             | 348                                                            | 912                                                            |
| <b><i>μ</i> [mm<sup>-1</sup>]</b>                  | 0.118                                                           | 0.104                                                          | 0.097                                                          |
| <b><i>θ</i> [°]</b>                                | 2.61-34.20                                                      | 2.35-31.43                                                     | 2.16- 18.20                                                    |
| <b>index range</b>                                 | -5 ≤ <i>h</i> ≤ 6<br>-11 ≤ <i>k</i> ≤ 11<br>-18 ≤ <i>l</i> ≤ 18 | -8 ≤ <i>h</i> ≤ 11<br>-9 ≤ <i>k</i> ≤ 9<br>-15 ≤ <i>l</i> ≤ 15 | -23 ≤ <i>h</i> ≤ 9<br>-5 ≤ <i>k</i> ≤ 4<br>-19 ≤ <i>l</i> ≤ 21 |
| <b><i>T</i> [K]</b>                                | 298(2)                                                          | 298(2)                                                         | 298(2)                                                         |
| <b><i>R</i>1</b>                                   | 0.0550                                                          | 0.0480                                                         | 0.0344                                                         |

|                           |        |        |        |
|---------------------------|--------|--------|--------|
| <b>wR2</b>                | 0.1834 | 0.1403 | 0.0649 |
| <b>R<sub>merge</sub></b>  | 0.0578 | 0.0568 | 0.0535 |
| <b>Parameters</b>         | 186    | 213    | 284    |
| <b>GOF</b>                | 1.367  | 1.059  | 1.100  |
| <b>reflns total</b>       | 4793   | 6979   | 6471   |
| <b>unique reflns</b>      | 2593   | 3420   | 1552   |
| <b>obsd reflns</b>        | 2442   | 2995   | 8540   |
| <b>CCDC<sup>[a]</sup></b> | 865731 | 865732 | 865730 |

### Hydrogen Bond Parameters:

**Table S2.** (Galactoside 1)

| D -- H ...A <sup>a</sup> | D -- H | H ... A | D -- A   | (D—H... A)/° |
|--------------------------|--------|---------|----------|--------------|
| O4 -- H4 ..O6 #1         | 0.820  | 1.980   | 2.785(3) | 166.0        |
| O5 -- H5A .. O6 #2       | 0.820  | 2.040   | 2.857(3) | 172.0        |
| O6 -- H6A .. O5          | 0.820  | 2.360   | 2.762(3) | 111.0        |
| O6 -- H6A .. O4 #3       | 0.820  | 2.050   | 2.805(3) | 153.0        |
| O7 -- H7 .. O4 #4        | 0.820  | 2.190   | 2.884(3) | 142.0        |
| C10 -- H10 .. O5 #5      | 0.980  | 2.2900  | 3.175(4) | 149.0        |

<sup>a</sup>Symmetry transformation code: #1=1-x,1/2+y,-z #2= 2-x,1/2+y,-z #3 = 2-x,-1/2+y,-z #4 = x,-1+y,z #5 = -1+x,y,z

**Table S3.** (Galactoside 2)

| D -- H ... A <sup>a</sup> | D -- H | H ... A | D -- A   | (D—H... A)/° |
|---------------------------|--------|---------|----------|--------------|
| O3 -- H3A .. O1 #1        | 0.820  | 2.090   | 2.857(3) | 156.0        |
| O5 -- H5A .. O3 #2        | 0.820  | 2.020   | 2.833(3) | 168.0        |
| C3 -- H3 .. O7 #3         | 0.930  | 2.520   | 3.275(4) | 139.0        |
| C12 -- H12 .. O5 #4       | 0.980  | 2.590   | 3.335(3) | 133.0        |

<sup>a</sup>Symmetry transformation code: #1 = 1+x,y,z #2 = x,-1+y,z #3 = -1+x,y,z #4= -x,1/2+y,-z

**Table S4.** (Galactoside 3)

| D -- H ... A <sup>a</sup> | D -- H | H ... A | D -- A   | (D—H... A)/° |
|---------------------------|--------|---------|----------|--------------|
| O4 -- H5 .. O5 #1         | 0.820  | 2.000   | 2.777(5) | 159.0        |
| C6 -- H6 .. O3            | 0.930  | 2.440   | 2.961(7) | 115.0        |
| C10 -- H10 .. O2 #2       | 0.980  | 2.560   | 3.525(6) | 170.0        |
| C16 -- H16A .. O8         | 0.970  | 2.290   | 2.712(7) | 105.0        |
| C23 -- H23 .. O7          | 0.930  | 2.380   | 2.699(8) | 100.0        |

<sup>a</sup>Symmetry transformation code: #1 = 1/2-x,1/2+y,-z #2 = x,-1+y,z

## 6. NMR spectra of compounds 1, 2 and 3:

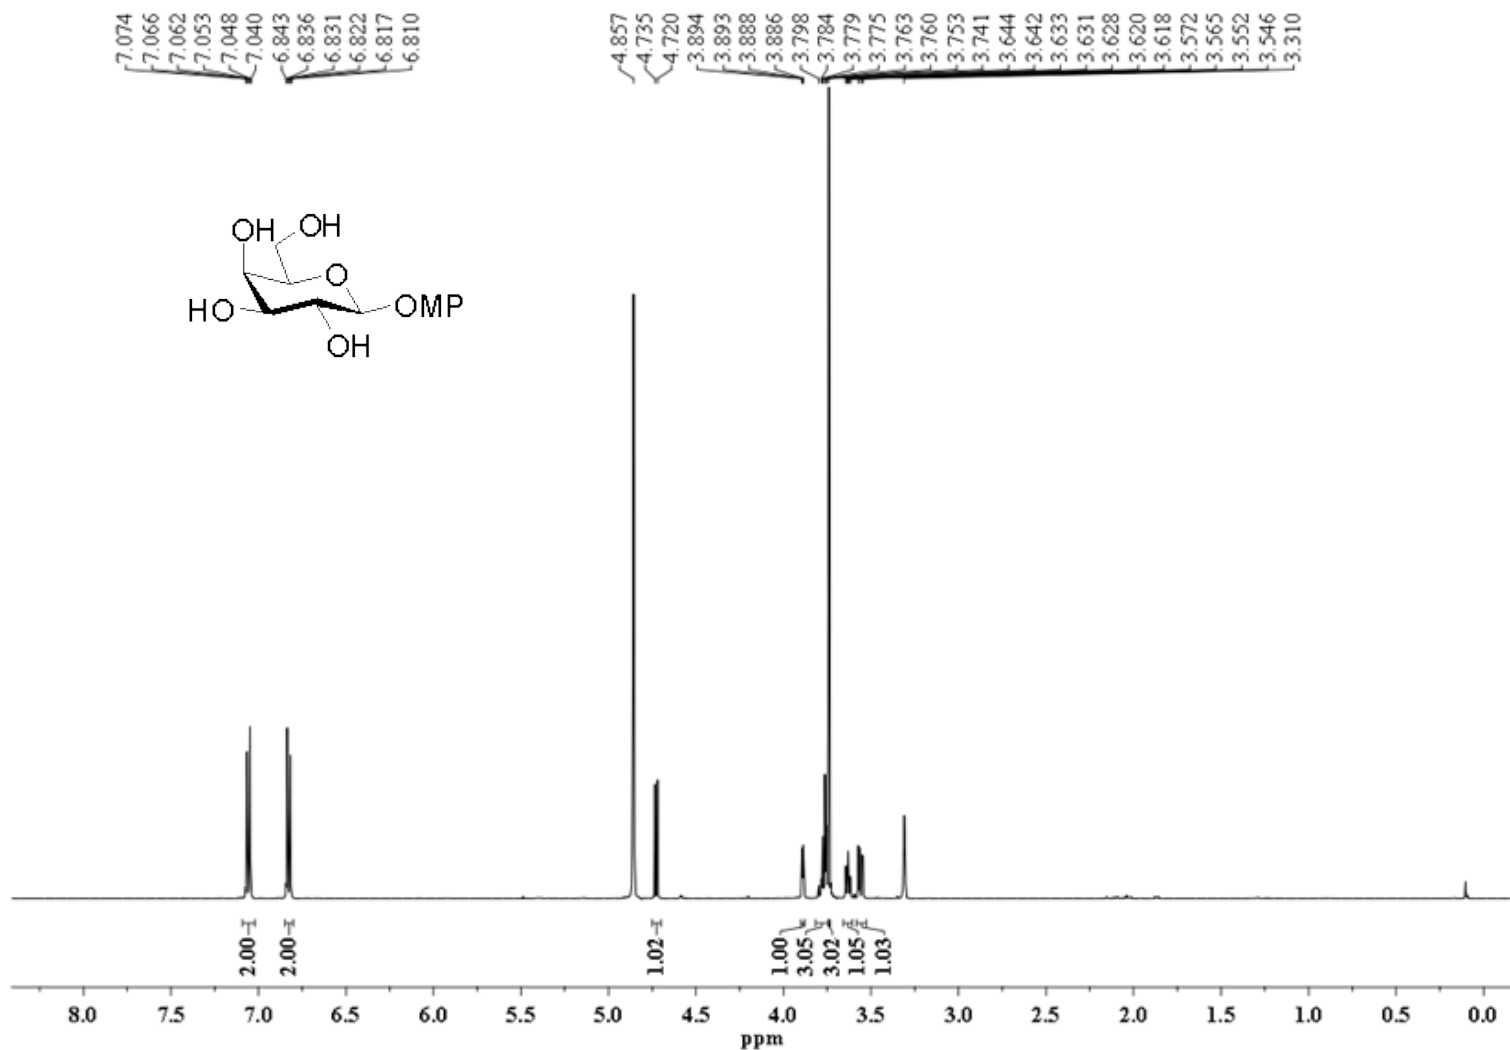

**Figure S3:** Proton NMR spectrum of compound **1** in CD<sub>3</sub>OD.



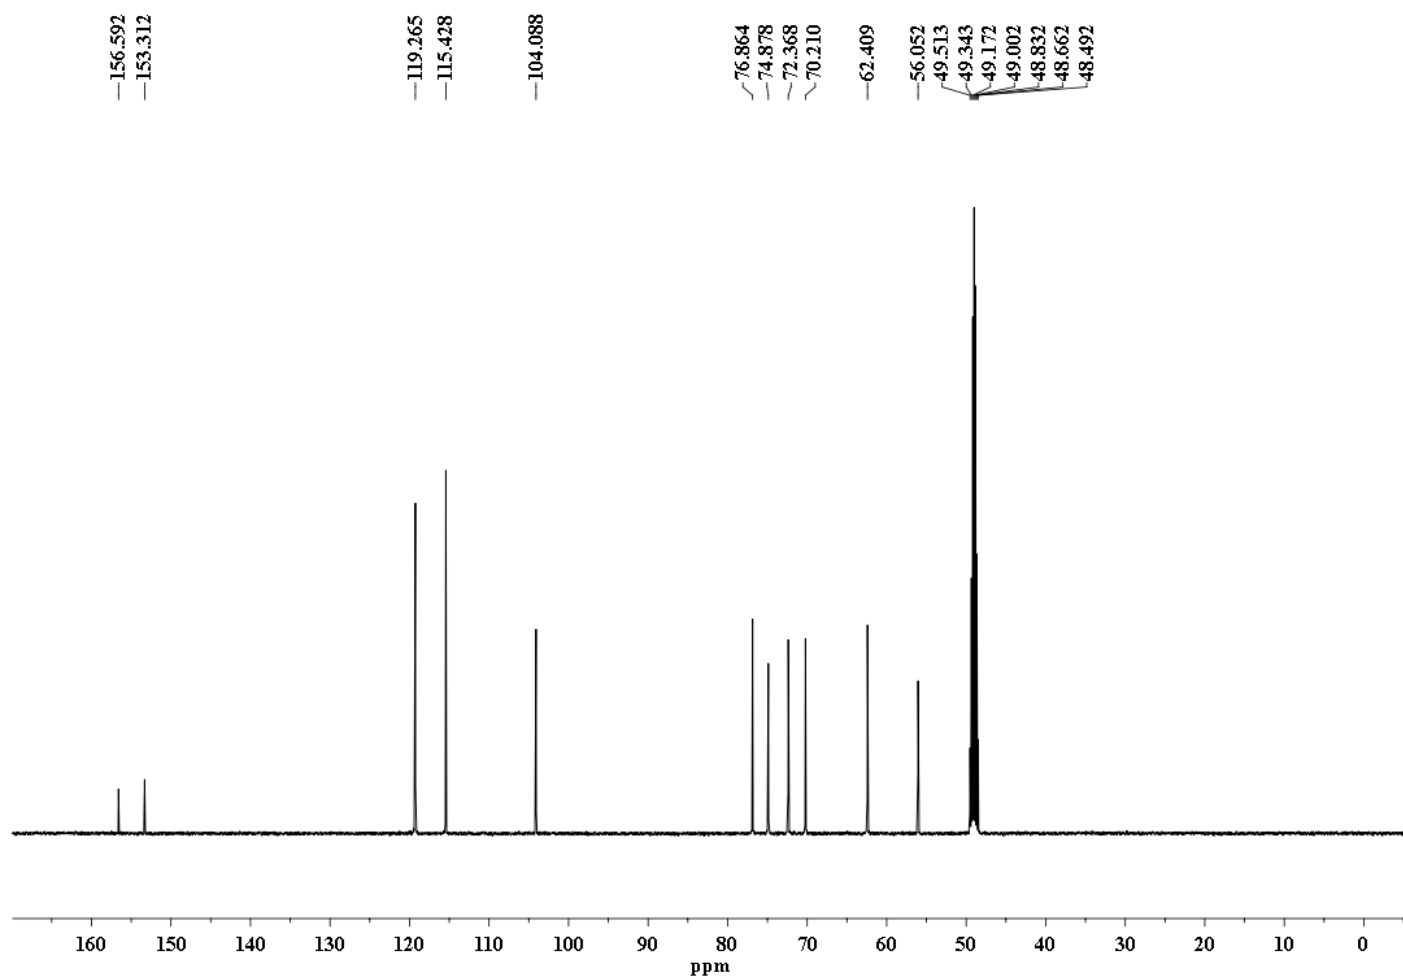

**Figure S4:** Carbon NMR spectrum of compound **1** in CD<sub>3</sub>OD.

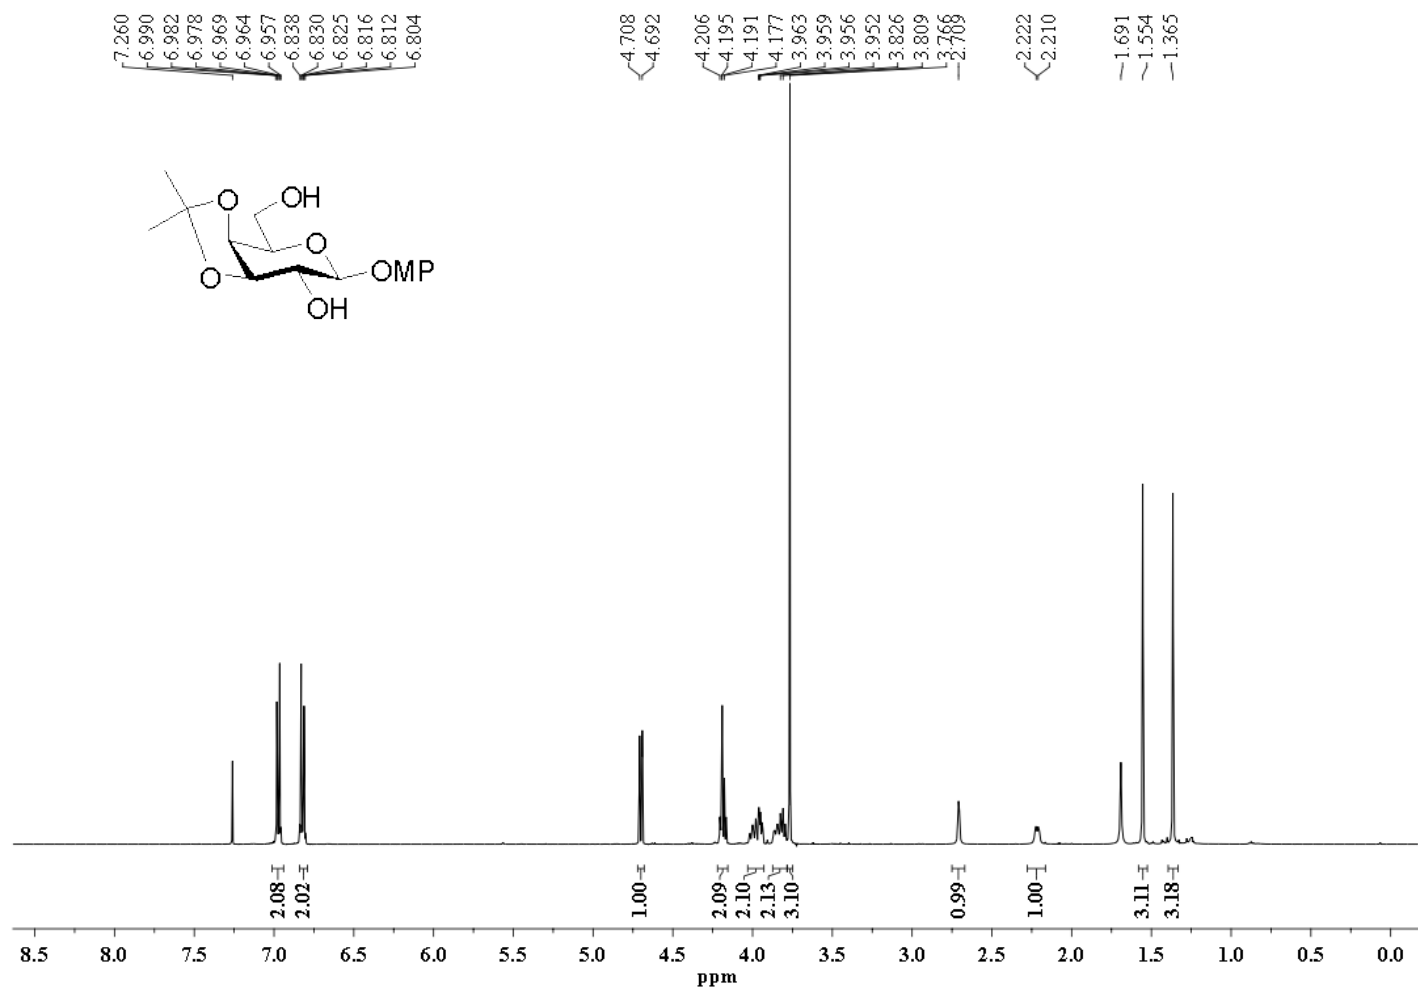

**Figure S5:** Proton NMR spectrum of compound **2** in CDCl<sub>3</sub>.

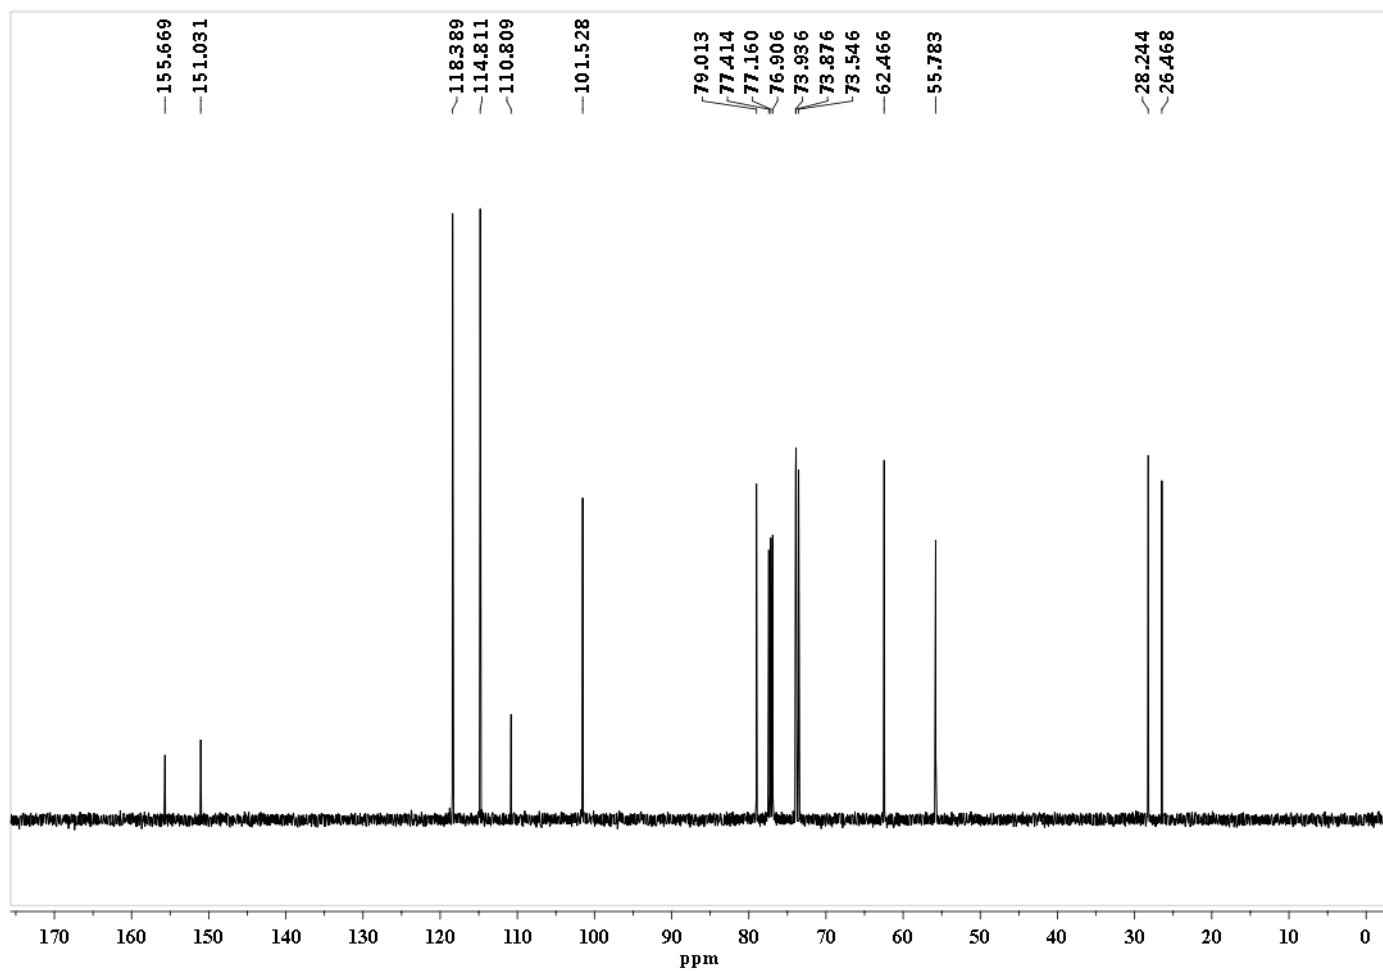

**Figure S6:** Carbon NMR spectrum of compound **2** in CDCl<sub>3</sub>.

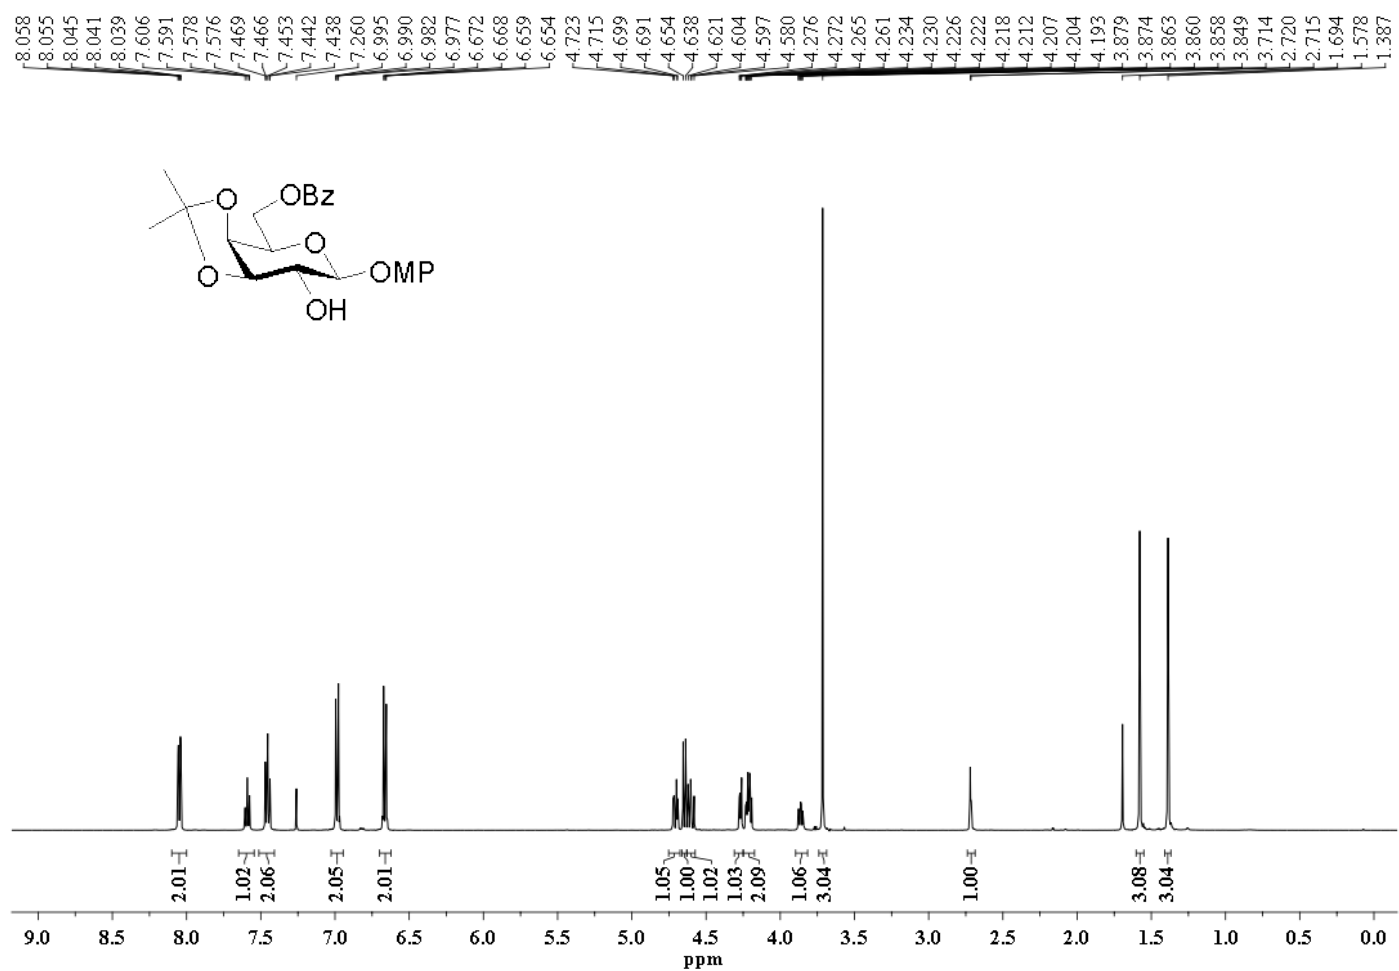

**Figure S7:** Proton NMR spectrum of compound **3** in  $\text{CDCl}_3$ .

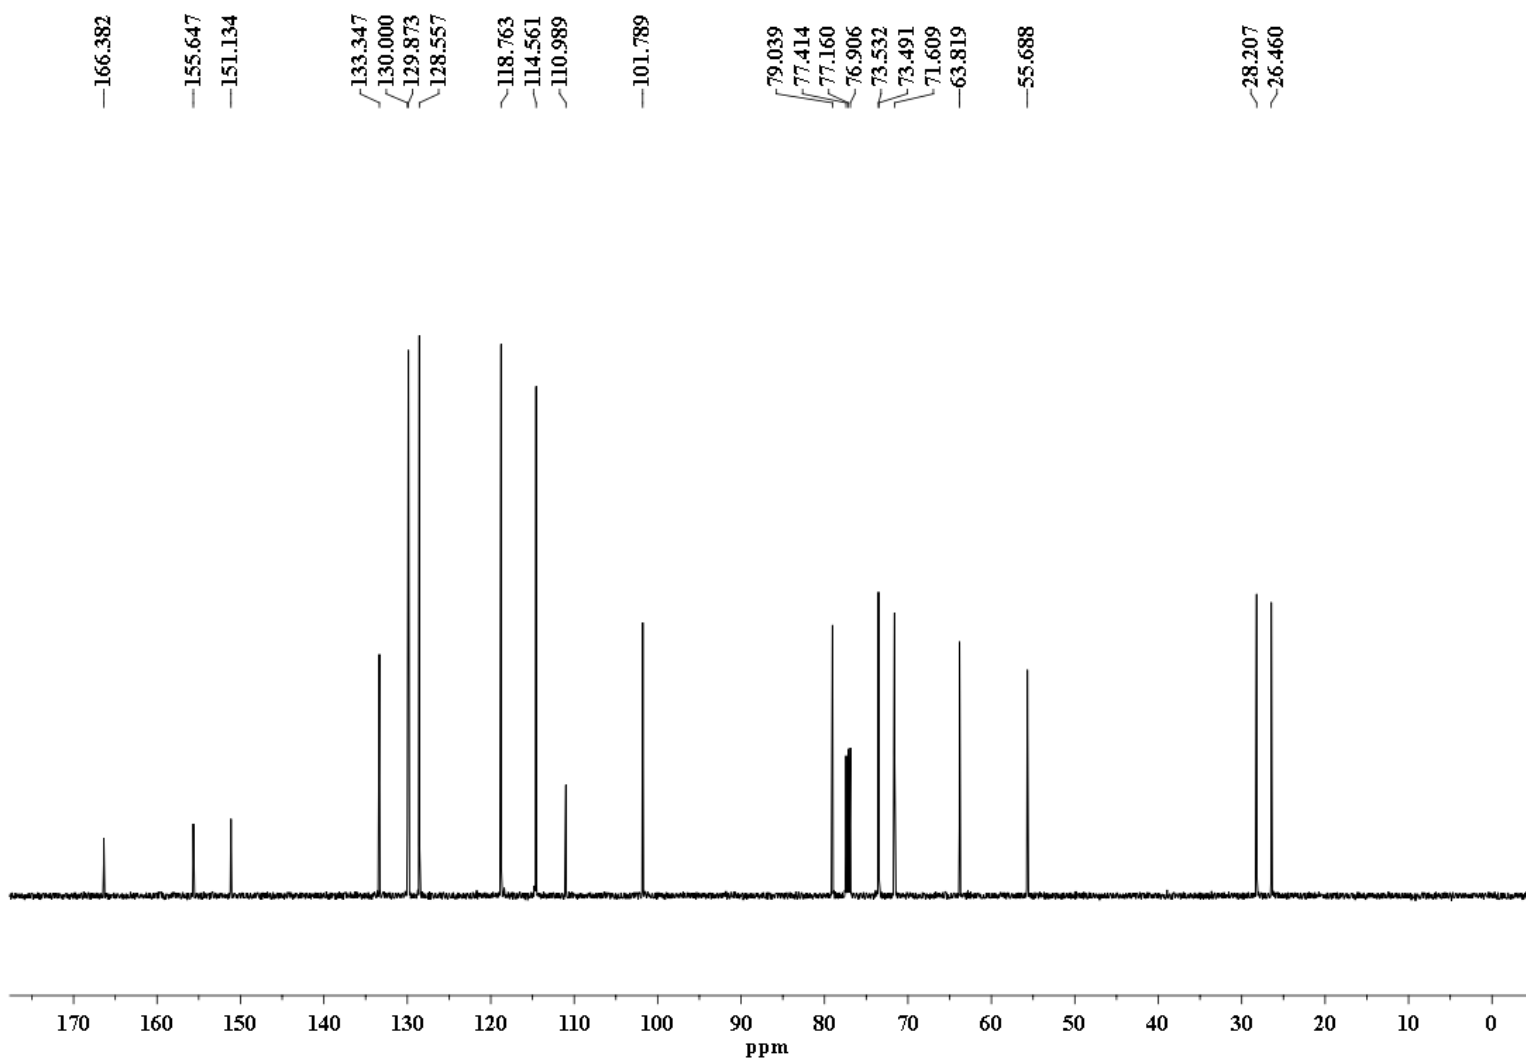

**Figure S8:** Carbon NMR spectrum of compound **3** in  $\text{CDCl}_3$ .

## 6. Mass spectra of compounds 1, 2 and 3:

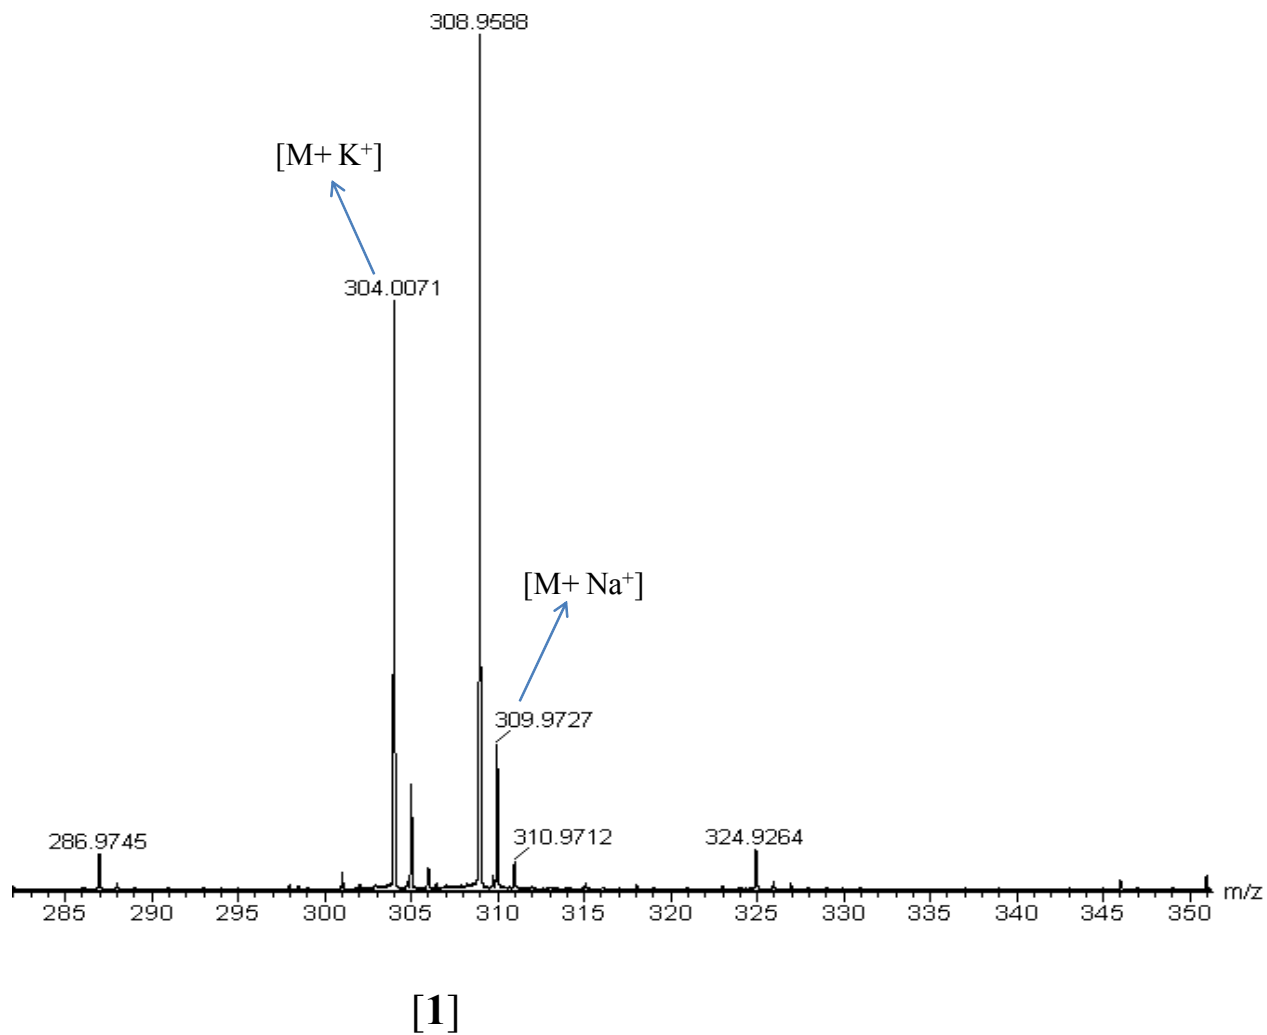

**Figure S9:** Mass spectrum of compound 1.

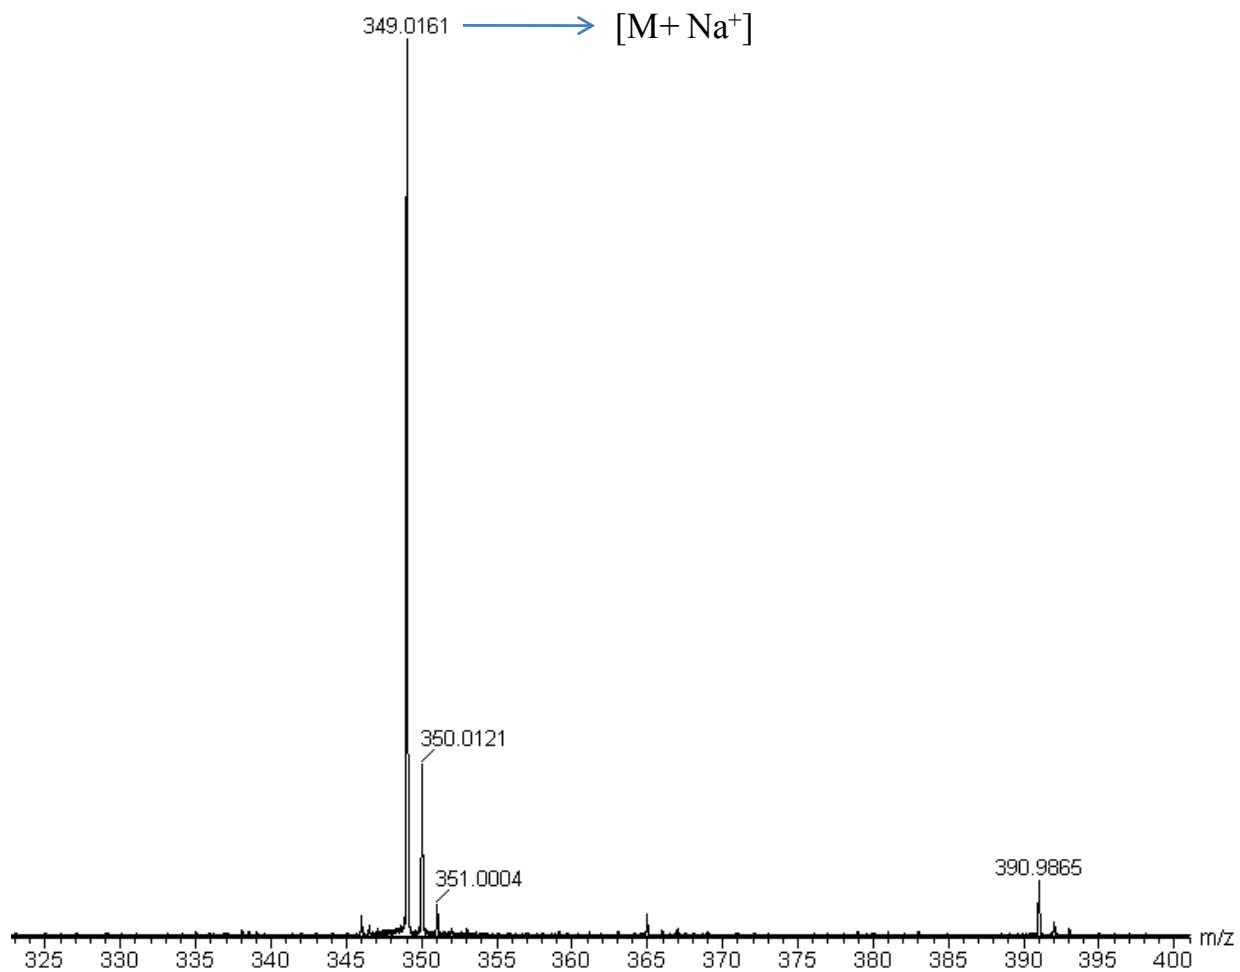

[2]

**Figure S10:** Mass spectrum of compound 2.

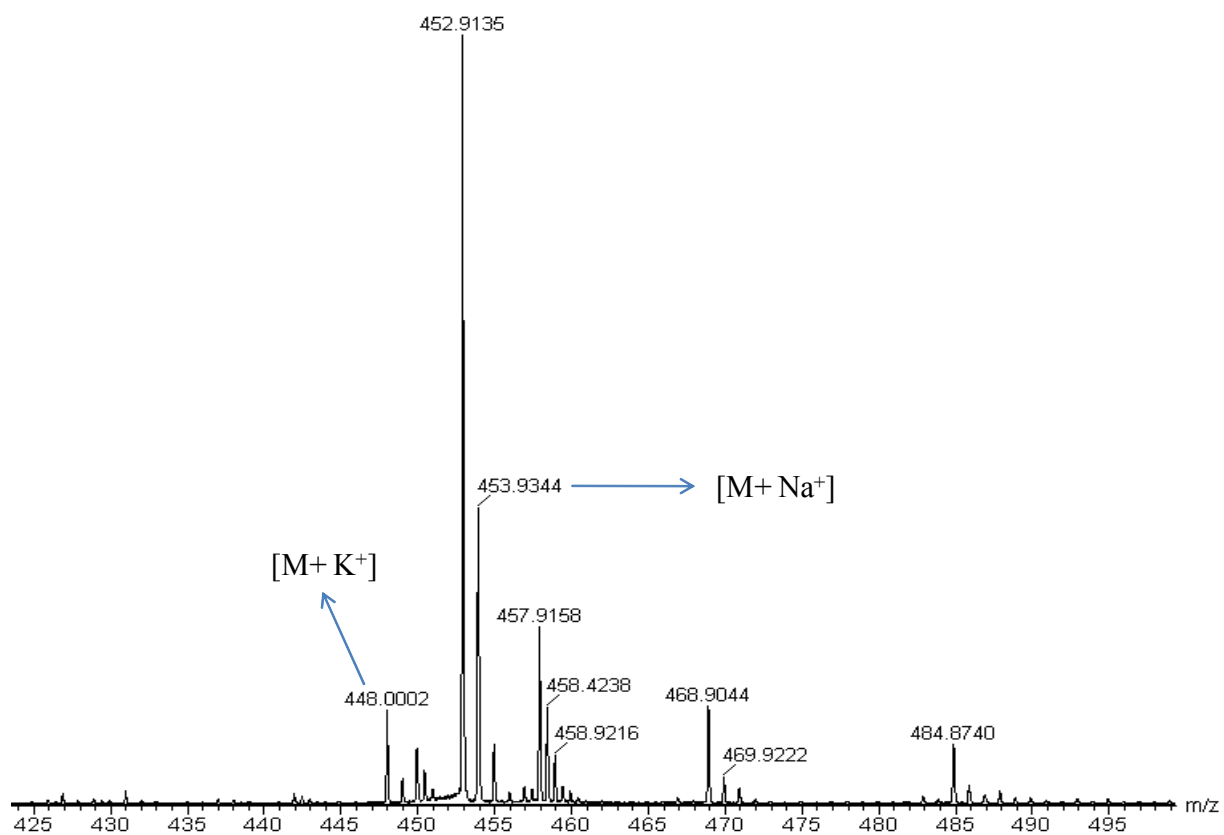

**[3]**

**Figure S11:** Mass spectrum of compound 3.



## References:

1. M. J. Frisch, G. W. Trucks, H. B. Schlegel, G. E. Scuseria, M. A. Robb, J. R. Cheeseman, J. A. Montgomery, Jr., T. Vreven, K. N. Kudin, J. C. Burant, J. M. Millam, S. S. Iyengar, J. Tomasi, V. Barone, B. Mennucci, M. Cossi, G. Scalmani, G. Rega, G. A. Petersson, H. Nakatsuji, M. Hada, M. Ehara, K. Toyota, R. Fukuda, J. Hasegawa, M. Ishida, T. Nakajima, Y. Honda, O. Kitao, H. Nakai, M. Klene, X. Li, J. E. Knox, H. P. Hratchian, J. B. Cross, C. Adamo, J. Jaramillo, R. Gomperts, R. E. Stratmann, O. Yazyev, A. J. Austin, R. Cammi, C. Pomelli, J. W. Ochterski, P. Y. Ayala, K. Morokuma, G. A. Voth, P. Salvador, J. J. Dannenberg, V. G. Zakrzewski, S. Dapprich, A. D. Daniels, M. C. Strain, O. Farkas, D. K. Malick, A. D. Rabuck, K. Raghavachari, J. B. Foresman, J. V. Ortiz, Q. Cui, A. G. Baboul, S. Clifford, J. Cioslowski, B. B. Stefanov, G. Liu, A. Liashenko, P. Piskorz, I. Komaromi, R. L. Martin, D. J. Fox, T. Keith, C. Y. Al-Peng, A. Nanayakkara, M. Challacombe, P. M. W. Gill, B. Johnson, W. Chen, M. W. Wong, C. Gonzalez, J. A. Pople, GAUSSIAN 03, Revision B.05, Gaussian, Inc., Pittsburgh, PA, 2003.
2. (a) A. D. Becke, *Phys. Rev. A*, 1988, **38**, 3098-3100; (b) A. D. Becke, *J. Chem. Phys.*, 1993, **98**, 5648-5652; (c) C. Lee, W. Yang and R. G. Parr, *Phys. Rev. B*, 1988, **37**, 785-789; (d) A. P. Scott and L. Radom, *J. Phys. Chem.*, 1996, **100**, 16502–16513.
